# Supplementary material
Source: PubMed Central journal article supplement (PMC363103)

**Figure S1**

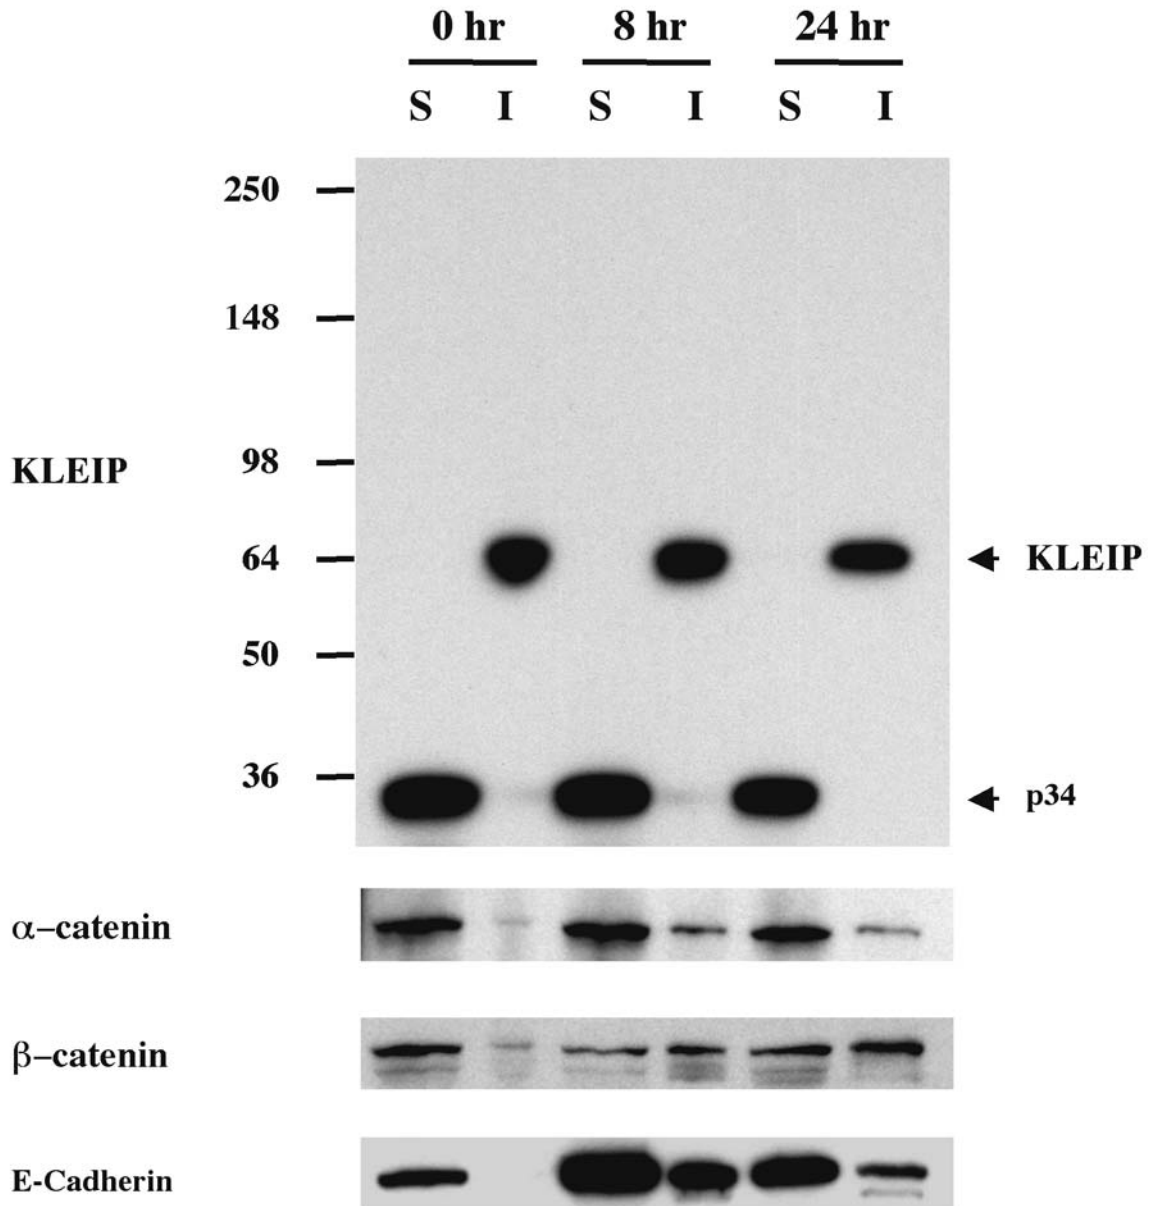

Supplement: mbc_15_3_1172__1.pdf [file mbc_15_3_1172__1.pdf]
